# Supplementary material for: Detection of Antibiotic-Resistant Bacteria, Resistance Determinants, and Mobile Elements in Surface Waters in Lebanon
Source: medRxiv preprint, doi:10.1101/2021.02.12.21251645, version 1 (2021-02-16)
Supplement: Supplemental Figure 4 [file 251645_file10.pdf]

|                          |          |
|--------------------------|----------|
| PHAGE_Salmon_SENS        |          |
| PHAGE_Escher_pos883      |          |
| PHAGE_Crocod_ENT47670    |          |
| PHAGE_Entero_HK140       |          |
| PHAGE_Salmon_RE_2010     |          |
| PHAGE_Pseudo_phiCTX      |          |
| phage-Entero-DE3         |          |
| PHAGE_Salmon_118970_sal3 |          |
| phage-Entero-cytron      |          |
| PHAGE_Escher_pro147      |          |
| PHAGE_Salmon_SENS4       |          |
| phage-Edvard-GF-2        |          |
| PHAGE_Entero_P88         |          |
| PHAGE_Escher_vB_EcoM_gp3 |          |
| PHAGE_Pseudo_phiPSA1     |          |
| PHAGE_Entero_fAA91_ss    |          |
| PHAGE_Slitgel_SIV        |          |
| PHAGE_Entero_mbp460      |          |
| PHAGE_Pecob_ZF40         |          |
| PHAGE_Escher_TL_2011b    |          |
| PHAGE_Salmon_SSU5        |          |
| PHAGE_Salmon_vB_SocS_Os8 |          |
| phage-Salmon-Fds-2       |          |
| PHAGE_Burkho_Bcepflu     |          |
| PHAGE_Entero_P1          |          |
| PHAGE_Slitgel_S16        |          |
| PHAGE_Entero_BP_4795     |          |
| PHAGE_Yersin_L_413C      |          |
| phage-Entero-P2          |          |
| Isolate                  | EC5      |
| Location                 | El Qa'a  |
| Season                   | W17      |
|                          | South    |
|                          | EC10     |
|                          | W17      |
|                          | South    |
|                          | EC12     |
|                          | W17      |
|                          | South    |
|                          | EC1      |
|                          | W17      |
|                          | Beirut   |
|                          | EC7      |
|                          | W17      |
|                          | Beirut   |
|                          | EC8      |
|                          | W18      |
|                          | El Qa'a  |
|                          | EC18     |
|                          | W18      |
|                          | El Qa'a  |
|                          | EC19     |
|                          | W18      |
|                          | El Qa'a  |
|                          | EC20     |
|                          | W18      |
|                          | El Qa'a  |
|                          | EC21     |
|                          | W18      |
|                          | El Qa'a  |
|                          | EC22     |
|                          | W18      |
|                          | El Qa'a  |
|                          | EC23     |
|                          | W18      |
|                          | El Beqaa |
|                          | EC35     |
|                          | W18      |
|                          | El Beqaa |
|                          | EC36     |
|                          | W18      |
|                          | Beirut   |
|                          | EC24     |
|                          | W18      |
|                          | South    |
|                          | EC27     |
|                          | W18      |
|                          | North    |
|                          | EC30     |
|                          | S17      |
|                          | El Beqaa |
|                          | KP10     |
|                          | S17      |
|                          | North    |
|                          | PR1      |
|                          | W17      |
|                          | Beirut   |
|                          | KP4      |
|                          | W17      |
|                          | North    |
|                          | KP8      |
|                          | W17      |
|                          | North    |
|                          | AB1      |
