# Supplementary material for: Detection of Antibiotic-Resistant Bacteria, Resistance Determinants, and Mobile Elements in Surface Waters in Lebanon
Source: bioRxiv or medRxiv preprint supplement (doi:10.1101/2021.02.12.21251645), 2021-02-16

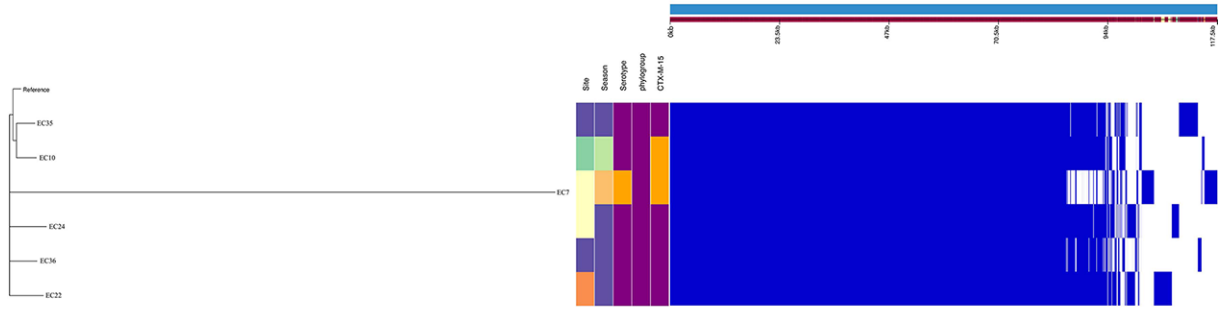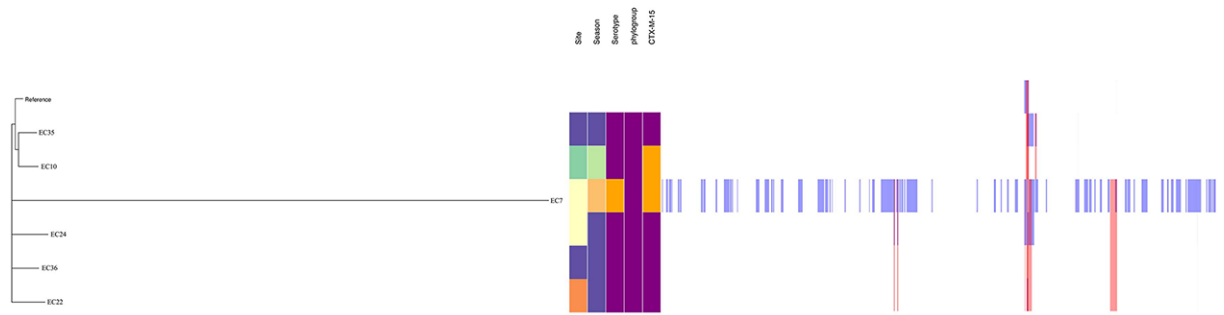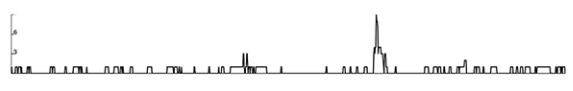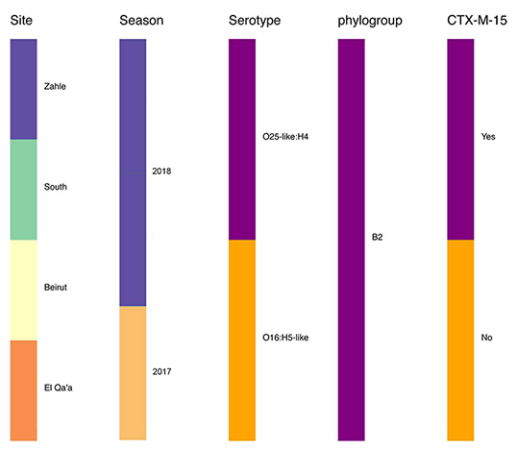

Supplement: Supplementary file [file media-3.pdf]
