# Supplementary material for: Detection of Antibiotic-Resistant Bacteria, Resistance Determinants, and Mobile Elements in Surface Waters in Lebanon
Source: bioRxiv or medRxiv preprint supplement (doi:10.1101/2021.02.12.21251645), 2021-02-16
Supplement: Supplementary file [file media-5.pdf]

| Organism          | Labeling             | Season | Area     | Organism                    | Labelings          | Season | Area     |
|-------------------|----------------------|--------|----------|-----------------------------|--------------------|--------|----------|
| <i>E. coli</i>    | EC1                  | 2017   | El Qa'a  | <i>A. baumannii</i>         | AB1                | 2017   | North    |
|                   | EC2 - EC5            | 2017   | El Qa'a  | <i>Aeromonas</i> spp.       | AE1 - AE7          | 2017   | El Qa'a  |
|                   | EC6 - EC8            | 2017   | Beirut   | <i>Citrobacter freundii</i> | CI1                | 2017   | El Beqaa |
|                   | EC9 - EC12           | 2017   | South    |                             | CI2                | 2017   | Al Qa'a  |
|                   | EC13 - EC15          | 2017   | El Beqaa |                             | CI3                | 2017   | Beirut   |
|                   | EC16 - EC23          | 2018   | El Qa'a  | <i>Citrobacter gilleni</i>  | C14                | 2017   | El Beqaa |
|                   | EC24 - EC26          | 2018   | Beirut   | <i>Delftia</i> spp.         | DE1                | 2017   | Beirut   |
|                   | EC27 - EC29          | 2018   | South    | <i>Hafnia</i>               | HA1                | 2017   | El Beqaa |
|                   | EC30 - EC32          | 2017   | North    | <i>Kluyvera ascorbata</i>   | KL1                | 2017   | El Beqaa |
|                   | EC33 - EC36          | 2018   | El Beqaa | <i>P. aeruginosa</i>        | PA1                | 2017   | Beirut   |
|                   | KP1 - KP2            | 2017   | North    |                             | PA2                | 2017   | North    |
|                   | <i>K. pneumoniae</i> | KP3    | 2017     | Beirut                      | <i>P. otitidis</i> | PO1    | 2017     |
| KP4               |                      | 2017   | Beirut   | <i>Providencia</i> spp.     | PR1                | 2017   | North    |
| KP5               |                      | 2017   | South    |                             | PR2                | 2017   | Al Qa'a  |
| KP6 - KP9         |                      | 2017   | North    | <i>Raoultella</i> spp.      | RA1 - RA3          | 2017   | El Beqaa |
| KP10              |                      | 2017   | El Beqaa | <i>Salmonella enterica</i>  | SA1                | 2017   | El Beqaa |
| EN1               |                      | 2017   | El Qa'a  | <i>Serratia marcescens</i>  | SM1                | 2017   | North    |
| Enterococcus spp. | EN2- EN5             | 2017   | El Qa'a  | <i>Shewanella</i> spp.      | SH1                | 2017   | Beirut   |
|                   | EN6                  | 2017   | Beirut   | <i>Enterobacter</i> spp.    | EB1                | 2017   | Beirut   |
|                   | EN7                  | 2017   | Beirut   |                             | EB2 - EB3          | 2017   | North    |
|                   | EN8                  | 2017   | South    |                             | EB4                | 2017   | El Beqaa |
|                   | EN9                  | 2017   | North    |                             | EB5                | 2017   | El Qa'a  |
|                   | EN10 - EN12          | 2017   | North    |                             | EB6 - EB7          | 2017   | Beirut   |
